# Supplementary material for: Boosting the energy storage densities of supercapacitors by incorporating N-doped graphene quantum dots into cubic porous carbon
Source: Royal Society of Chemistry journal article supplement (doi:10.1039/c8nr06986g), 2018-01-01
Supplement: c8nr06986g1.pdf [file c8nr06986g1.pdf]

## Supporting Information

### Boosting the energy storage densities of supercapacitors by incorporating N-doped graphene quantum dots into cubic porous carbon

Zhen Li <sup>a\*</sup>, Fan Bu <sup>a</sup>, Junjie Wei <sup>a</sup>, Weiwei Yao <sup>a</sup>, Liang Wang <sup>b</sup>, Zhiwen Chen <sup>a</sup>, Dengyu Pan <sup>b\*</sup>, and Minghong Wu <sup>b\*</sup>

<sup>a</sup> Shanghai Applied Radiation Institute, Shanghai University, Shanghai 200444, P. R. China.

<sup>b</sup> School of Environmental and Chemical Engineering, Shanghai University, Shanghai 201800, P. R. China.

\*Corresponding author. Tel: 86 21-66137795. E-mail: lizhen@shu.edu.cn (Zhen Li); Tel: 86 21-66137721. E-mail: dypan617@shu.edu.cn (Dengyu Pan); Tel: 86 21-66137781. E-mail: mhwu@shu.edu.cn (Minghong Wu)

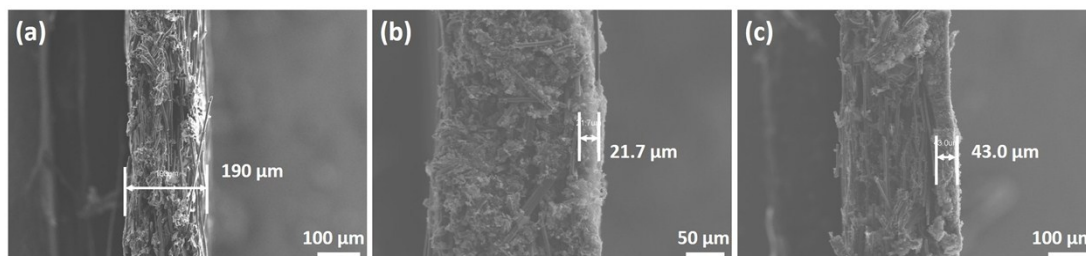

**Fig S1.** Cross-section SEM image of (a) carbon paper, (b) and (c) N-GQD/cMOF-5 electrodes with mass loading of 1.72 and 8.12 mg cm<sup>-2</sup>, respectively.

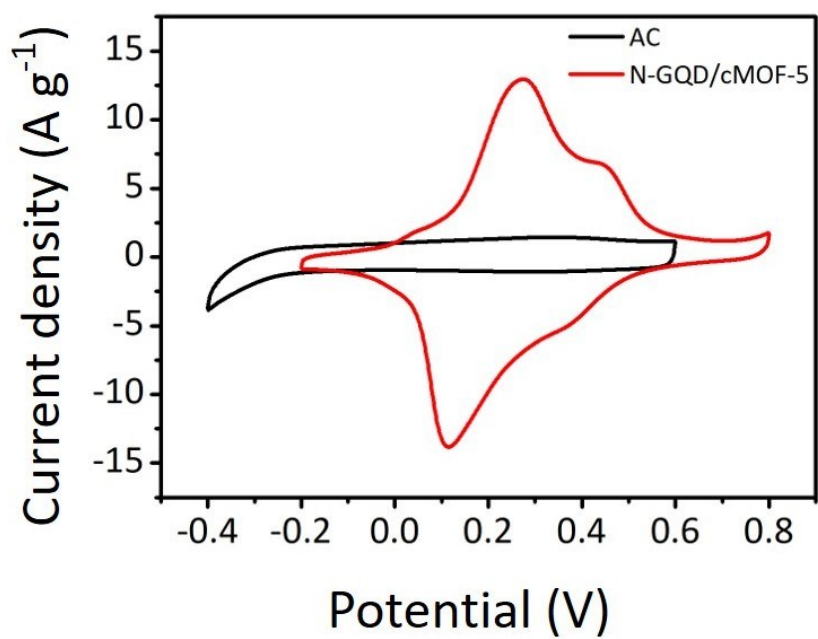

**Fig S2.** CV curves of the AC and N-GQD/cMOF-5 electrodes at  $10 \text{ mV s}^{-1}$  in  $\text{H}_2\text{SO}_4$  electrolyte.

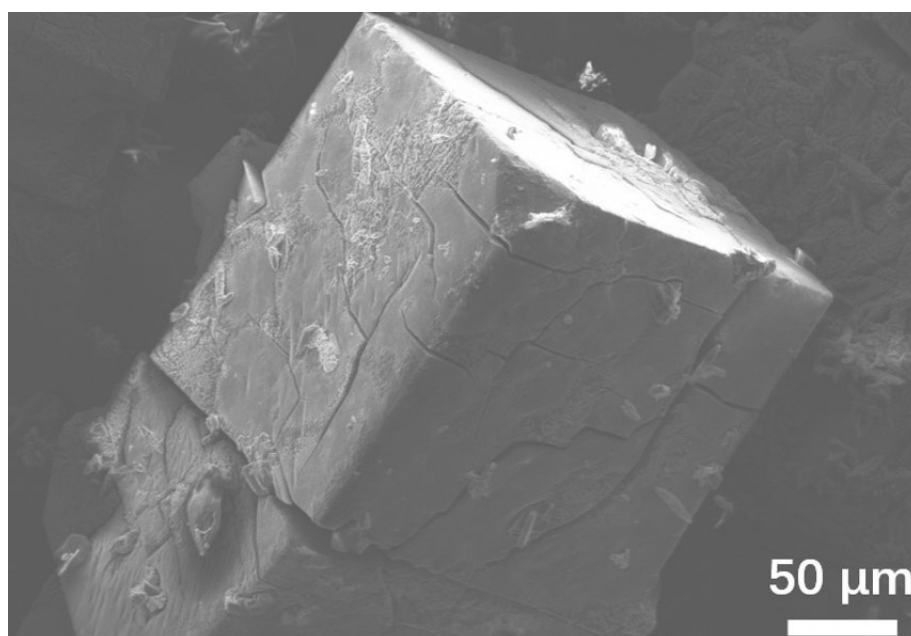

**Fig S3.** SEM image of MOF-5.

**Table S1** XPS elemental analysis of N-GQDs and N-GQD/cMOF-5.

| Sample       | C(at%) | N(at%) | O(at%) |
|--------------|--------|--------|--------|
| N-GQDs       | 69.7   | 23.2   | 7.1    |
| N-GQD/cMOF-5 | 82.0   | 11.7   | 6.3    |

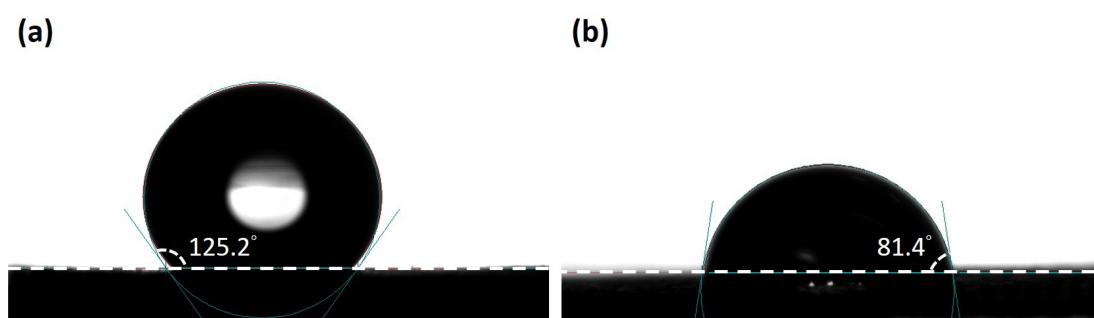

**Fig S4.** The contact angles of a drop of water on the cMOF-5 (a) and the N-GQD@cMOF-5 electrodes (b).

**Table S2** Summary of electrochemical performances of porous carbon materials.

| Materials                                 | Current density (A g <sup>-1</sup> ) | Specific capacitance (F g <sup>-1</sup> ) | Energy density (Wh kg <sup>-1</sup> ) | Power density (W kg <sup>-1</sup> ) | Cycling stability | Electrolyte                         | Ref.      |
|-------------------------------------------|--------------------------------------|-------------------------------------------|---------------------------------------|-------------------------------------|-------------------|-------------------------------------|-----------|
| N-GQD/cMOF-5                              | 0.5                                  | 294.1                                     | 10.2                                  | 125                                 | 12000 (84.6%)     | 1 M H <sub>2</sub> SO <sub>4</sub>  | This work |
| MPC-A                                     | 0.25                                 | 274                                       | 9.4                                   | 70                                  | /                 | 6 M KOH                             | [22]      |
| Interconnected mesoporous carbon sheets   | 0.05                                 | 242                                       | 8.41                                  | 26                                  | 10000 (94.2%)     | 6 M KOH                             | [38]      |
| 3D IHPNCs                                 | 1                                    | 389                                       | 8.7                                   | 195                                 | 10000 (90%)       | 1 M Na <sub>2</sub> SO <sub>4</sub> | [39]      |
| N-doped porous carbon sheets              | 1                                    | 290                                       | 6.12                                  | 250                                 | 10000 (81.9%)     | 1 M H <sub>2</sub> SO <sub>4</sub>  | [40]      |
| N-doped graphdiyne                        | 0.2                                  | 250                                       | 8.66                                  | 19300                               | 3000 (95.6%)      | 7 M KOH                             | [41]      |
| N-doped three-dimensional graphitic foams | 1                                    | 242                                       | 8.4                                   | 10000                               | 100000 (77%)      | 6 M KOH                             | [42]      |
| MOF-derived porous carbon/CNT             | 1                                    | 157.9                                     | 9.1                                   | 3500                                | 10000 (95%)       | 6 M KOH                             | [43]      |

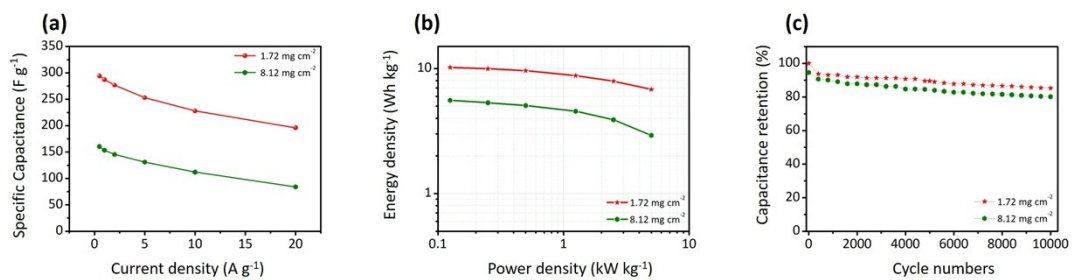

**Fig S5.** (a) Specific capacitance with low (1.72 mg cm<sup>-2</sup>) and high (8.12 mg cm<sup>-2</sup>) mass loadings at different current densities. (b) Ragone plots of devices with different mass loadings from 0.5 to 20 A g<sup>-1</sup>. (c) Cycling performance of devices with different mass loadings measured at 5 A g<sup>-1</sup>.
